# Supplementary material for: The photoluminescence of isolated and paired Bi3+ ions in layered LnOCl crystals: a first-principles study
Source: Royal Society of Chemistry journal article supplement (doi:10.1039/d2cp01376b), 2022-01-01
Supplement: d2cp01376b1.pdf [file d2cp01376b1.pdf]

**Electronic Supplementary Information of**  
**The photoluminescence of isolated and paired Bi<sup>3+</sup> ion in layered**  
**LnOCl crystals: A first-principles study**

Qiaoling Chen,<sup>1,2</sup> Zhaoyang Feng,<sup>1,2</sup> MingZhe Liu,<sup>1,2</sup>  
Bibo Lou,<sup>3</sup> Chonggeng Ma,<sup>3</sup> and Chang-Kui Duan<sup>1,2,\*</sup>

<sup>1</sup>*CAS Key Laboratory of Microscale Magnetic Resonance, and School of Physical Sciences,  
University of Science and Technology of China, Hefei 230026, China*

<sup>2</sup>*CAS Center for Excellence in Quantum Information and Quantum Physics,  
University of Science and Technology of China, Hefei 230026, China*

<sup>3</sup>*School of Optoelectronic Engineering & CQUPT-BUL Innovation Institute,  
Chongqing University of Posts and Telecommunications, Chongqing 400065, China*

---

\* ckduan@ustc.edu.cn

TABLE S1. Calculated (calc.) and reported experimental (expt.) lattice parameters of LnOCl (Ln = Y, Gd, La) and BiOCl crystals

| System | Space group | Method    | a ( $\text{\AA}$ ) | c ( $\text{\AA}$ ) | $\alpha, \beta, \gamma$ (deg) | volume ( $\text{\AA}^3$ ) |
|--------|-------------|-----------|--------------------|--------------------|-------------------------------|---------------------------|
| YOCl   | P4/nmm      | calc.     | 3.86               | 6.56               | 90, 90,90                     | 98.01                     |
|        |             | expt. [1] | 3.90               | 6.60               | 90, 90,90                     | 100.4                     |
| GdOCl  | P4/nmm      | calc.     | 3.89               | 6.50               | 90, 90,90                     | 100.08                    |
|        |             | expt. [2] | 3.95               | 6.67               | 90, 90,90                     | 104.05                    |
| LaOCl  | P4/nmm      | calc.     | 4.07               | 6.84               | 90, 90,90                     | 113.42                    |
|        |             | expt. [3] | 4.12               | 6.87               | 90, 90,90                     | 116.48                    |
| BiOCl  | P4/nmm      | calc.     | 3.88               | 7.35               | 90, 90,90                     | 110.46                    |
|        |             | expt. [4] | 3.89               | 7.35               | 90, 90,90                     | 110.95                    |

TABLE S2. The optimized Bi pair distances in LnOCl crystals (in units of  $\text{\AA}$ )

|        | YOCl | GdOCl | LaOCl |
|--------|------|-------|-------|
| Pair-1 | 3.58 | 3.59  | 3.62  |
| Pair-2 | 3.85 | 3.88  | 4.08  |

TABLE S3. Formation energies of isolated and paired Bi and binding energies of Bi pairs (in units of eV)

|       | Formation energy |        |        | Binding energy |        |
|-------|------------------|--------|--------|----------------|--------|
|       | single           | pair-1 | pair-2 | pair-1         | pair-2 |
| YOC1  | -0.39            | -0.75  | -0.79  | -0.035         | 0.004  |
| GdOC1 | -0.23            | -0.44  | -0.46  | -0.027         | -0.007 |
| LaOC1 | 0.24             | 0.46   | 0.56   | 0.030          | -0.007 |

TABLE S4. The experimental and calculated excitation (Exc.), emission (Emi.), and the Stokes shift ( $\Delta S$ ) of Bi pair-2 in LnOC1 hosts (in units of eV)

| Host  | Method | Exc. | Emi. | $\Delta S$ |
|-------|--------|------|------|------------|
| YOC1  | GGA    | 4.05 | 3.19 | 0.86       |
|       | Expt.  | 4.87 | 3.00 | 1.87       |
| GdOC1 | GGA    | 4.01 | 3.21 | 0.80       |
|       | Expt.  | 4.82 | 2.79 | 2.03       |
| LaOC1 | GGA    | 3.76 | 2.70 | 1.06       |
|       | Expt.  | 4.48 | 2.65 | 1.83       |

TABLE S5. The average Bi–O bond lengths of  $[\text{BiO}_4]$  in the geometric structure of excitonic state of BiOC1 crystal (in units of Å)

| Layers  | Average Bi–O bond lengths |       |       |       |       |       |       |       |
|---------|---------------------------|-------|-------|-------|-------|-------|-------|-------|
| Layer-1 | 2.310                     | 2.310 | 2.310 | 2.310 | 2.310 | 2.310 | 2.311 | 2.309 |
| Layer-2 | 2.270                     | 2.284 | 2.274 | 2.277 | 2.305 | 2.305 | 2.307 | 2.307 |
| Layer-3 | 2.300                     | 2.300 | 2.300 | 2.300 | 2.299 | 2.300 | 2.299 | 2.300 |
| Layer-4 | 2.299                     | 2.302 | 2.301 | 2.301 | 2.301 | 2.301 | 2.301 | 2.301 |

\* The partial charge density of KS orbitals show that the hole is distributed on the layer-2 and the electron is extended over layer-1 and layer-2 in the main text.

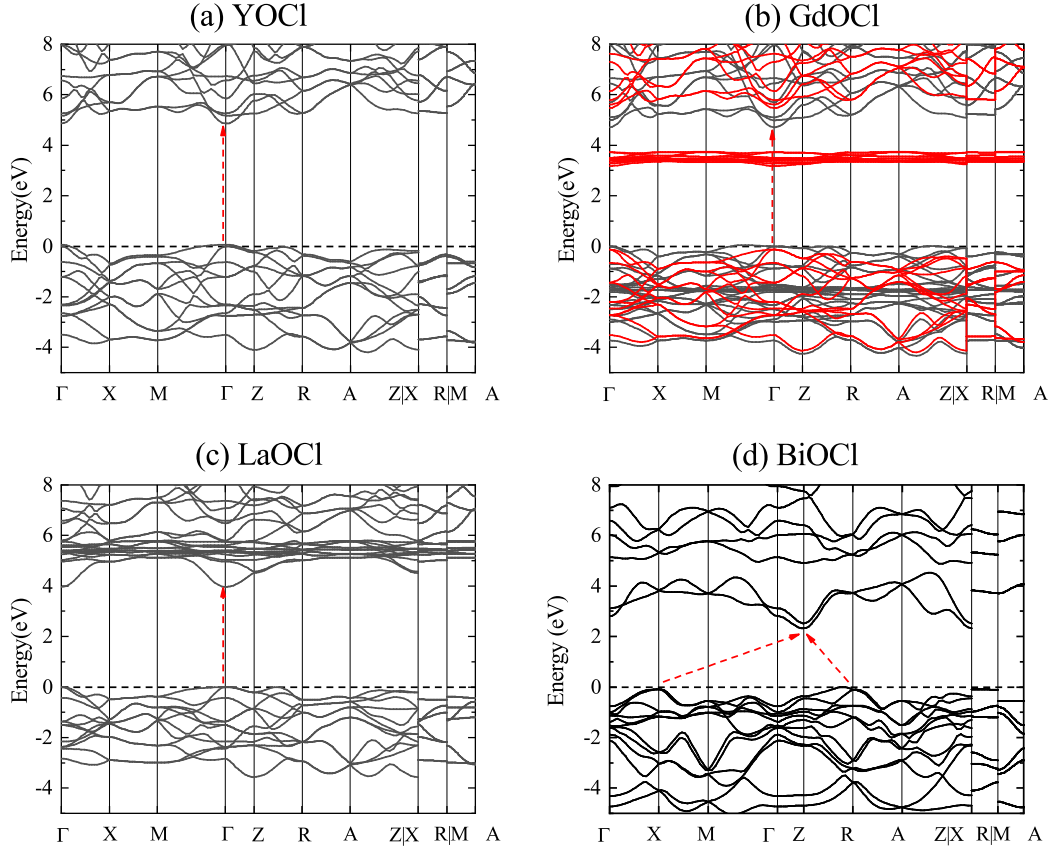

FIG. S1. Electronic band structures of YOCl (a), GdOCl (b), LaOCl (c) and BiOCl (d) obtained by GGA-PBEsol method.

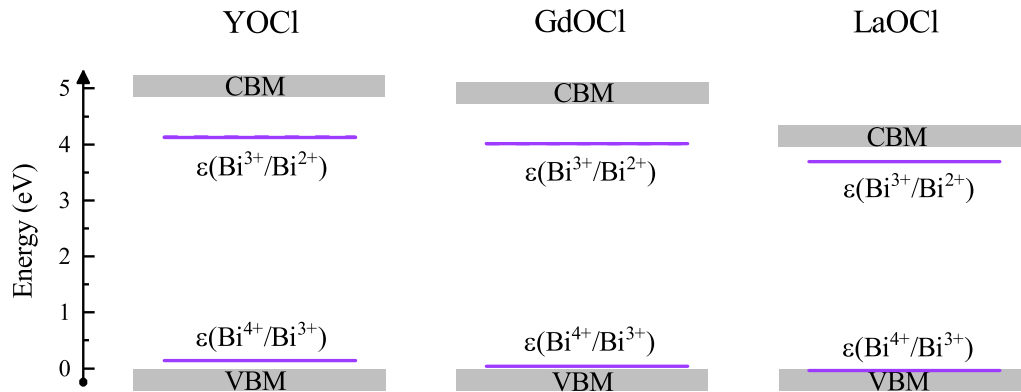

FIG. S2. Thermodynamic charge-state transition levels of single Bi dopant in LnOCl (Ln = Y, Gd, La) crystals calculated by GGA-PBEsol method.

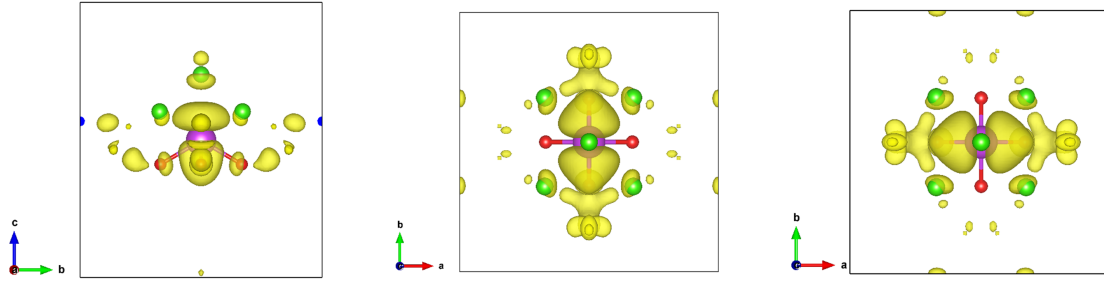

FIG. S3. The partial charge density distributions of Bi-6*p* orbitals of  $A_1$  (left) and  $E$  (right two) levels without SOC.

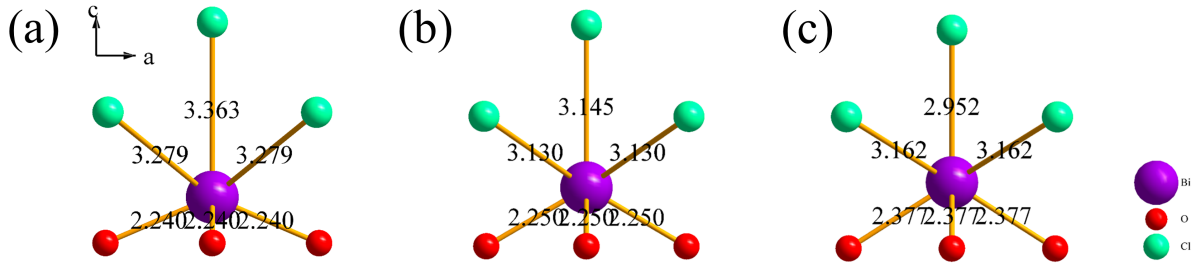

FIG. S4. The equilibrium geometric configurations of excited state without SOC (a), ground state with SOC (b) and excited state with SOC (c).

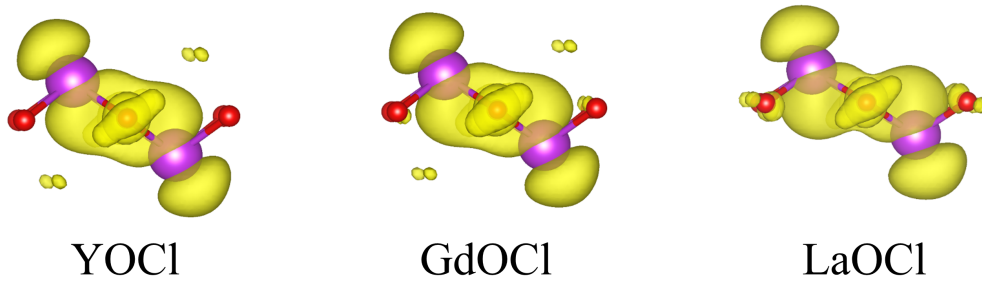

FIG. S5. The partial charge density distributions of occupied *p* orbitals of Bi pair-1 without SOC in YOCl, GdOCl and LaOCl hosts, which show the orbital hybridization between Bi pair and are remarkably different from the partial charge density distribution of Bi pair with SOC, as discussed in Fig. 3(b) of main text.

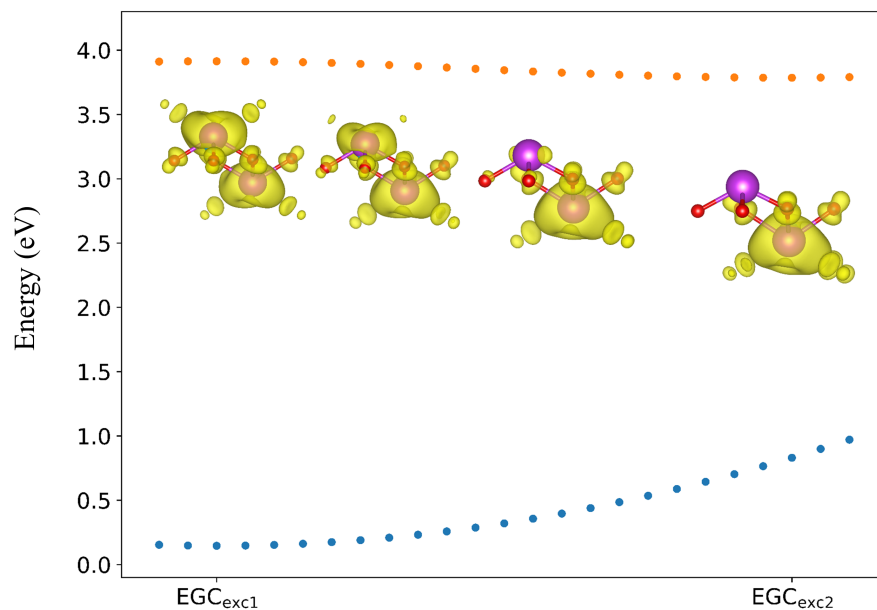

FIG. S6. Configuration coordination diagram along the geometric configuration path of ‘exc1’ and ‘exc2’ excited states and the insets are the  $6p$  partial charge density distributions.

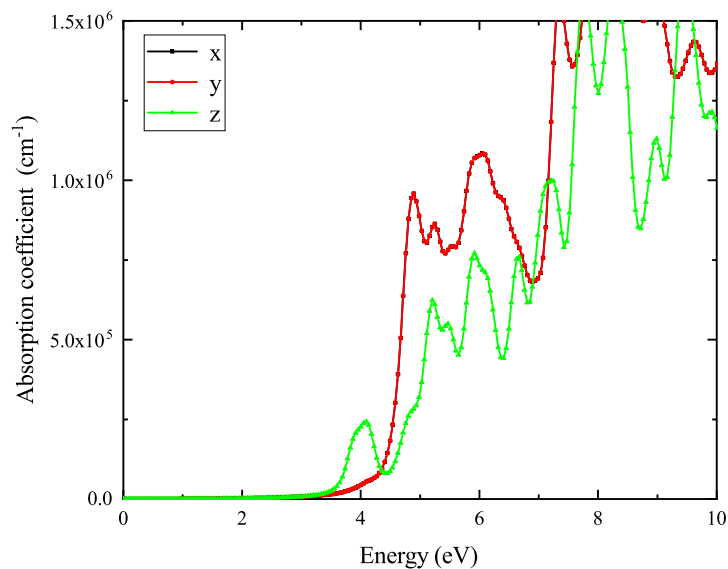

FIG. S7. The absorption coefficients of BiOCl by HSE06 calculations. The x and y polarizations are the same due to axial symmetry.

- 
- [1] W. H. Zachariasen, *Acta Crystallographica* **2**, 388 (1949).
- [2] G. Meyer and T. Schleid, *Zeitschrift für Anorganische und Allgemeine Chemie* **533**, 181 (1986).
- [3] J. Hölsä, M. Lastusaari, and J. Valkonen, *Journal of Alloys and Compounds* **262**, 299 (1997).
- [4] A. Biswas, R. Das, C. Dey, R. Banerjee, and P. Poddar, *Crystal Growth & Design* **14**, 236 (2014).
